# Supplementary material for: Beneficial Effects of Partly Milled Highland Barley on the Prevention of High-Fat Diet-Induced Glycometabolic Disorder and the Modulation of Gut Microbiota in Mice
Source: MDPI journal article supplement (doi:10.3390/nu14040762), 2022-02-11
Supplement: s1 [file s1]

**Table S1.** Composition and energy supply of experimental diets

| <b>Ingredient<br/>(g/kg)</b>             | <b>NC <sup>1</sup></b> | <b>MC</b> | <b>LD</b> | <b>MD</b> | <b>HD</b> |
|------------------------------------------|------------------------|-----------|-----------|-----------|-----------|
| PHB flour, 60 mesh                       | 0                      | 0         | 100       | 200       | 300       |
| Casein                                   | 200                    | 258.46    | 247.07    | 235.66    | 224.27    |
| L-Cystine                                | 3                      | 3.88      | 3.88      | 3.88      | 3.88      |
| Corn Starch                              | 506.2                  | 0         | 0         | 0         | 0         |
| Maltodextrin 10                          | 125                    | 161.54    | 89.22     | 16.82     | 0         |
| Sucrose                                  | 68.8                   | 88.91     | 88.91     | 88.91     | 33.42     |
| Cellulose, BW200                         | 50                     | 64.62     | 51.75     | 38.86     | 25.99     |
| Soybean Oil                              | 25                     | 32.31     | 28.89     | 25.47     | 22.06     |
| Lard                                     | 20                     | 316.61    | 316.60    | 316.60    | 316.60    |
| Mineral Mix S10026                       | 10                     | 12.92     | 12.92     | 12.92     | 12.92     |
| DiCalcium Phosphate                      | 13                     | 16.80     | 16.80     | 16.80     | 16.80     |
| Calcium Carbonate                        | 5.5                    | 7.11      | 7.11      | 7.11      | 7.11      |
| Potassium Citrate, 1<br>H <sub>2</sub> O | 16.5                   | 21.32     | 21.32     | 21.32     | 21.32     |
| Vitamin Mix, V10001                      | 10                     | 12.92     | 12.92     | 12.92     | 12.92     |
| Choline Bitartrate                       | 2                      | 2.58      | 2.58      | 2.58      | 2.58      |
| FD&C Blue Dye #1                         | 0.01                   | 0.06      | 0         | 0         | 0         |
| FD&C Yellow Dye #5                       | 0.04                   | 0         | 0         | 0         | 0         |
| Total (g)                                | 1000.00                | 1000.00   | 999.97    | 999.85    | 999.87    |
| Calculated energy (kcal%)                |                        |           |           |           |           |
| Protein                                  | 20                     | 20        | 20        | 20        | 20        |
| Fat                                      | 10                     | 60        | 60        | 60        | 60        |
| Carbohydrate                             | 70                     | 20        | 20        | 20        | 20        |
| $\beta$ -glucan (g/100g)                 | - <sup>2</sup>         | -         | 0.45      | 0.85      | 1.27      |

<sup>1</sup> Abbreviations: PHB, partly milled highland barley; NC, normal control group fed a low-fat diet; MC, model control group fed a high-fat diet (HFD); LD, low-dose group fed HFD containing 10% PHB; MD, middle-dose group fed HFD containing 20% PHB; HD, high-dose group fed HFD containing 30% PHB.

<sup>2</sup> "-": Not detected.

**Table S2.** Contents of the major nutrients and functional components of highland barley with different milling degrees

| Milling degree (%) | Starch (g/100g) | Protein (g/100g) | Fat (g/100g) | Total fiber (g/100g) | $\beta$ -glucan (g/100g) | Total polyphenolics (mg/kg) |
|--------------------|-----------------|------------------|--------------|----------------------|--------------------------|-----------------------------|
| 10                 | 62.5            | 11.1             | 4.5          | 8.9                  | 4.47                     | 4305.0                      |
| 20                 | 63.8            | 9.9              | 2.7          | 6.6                  | 3.39                     | 3571.0                      |
| 30                 | 67.5            | 8.8              | 1.1          | 5.5                  | 4.52                     | 3158.7                      |

**Table S3.** Starch digestion properties in highland barley with different milling degrees

| Milling degree (%) | Starch  |         |        |
|--------------------|---------|---------|--------|
|                    | RDS (%) | SDS (%) | RS (%) |
| 10                 | 33.28   | 44.99   | 21.73  |
| 20                 | 37.09   | 43.29   | 19.62  |
| 30                 | 40.99   | 39.11   | 19.90  |

Abbreviations: RDS, Rapidly Digestible Starch; SDS, Slowly Digestible Starch; RS, Resistant Starch.

**Table S4.** eGI in highland barley with different milling degrees

| Milling degree (%) | $C_{\infty}$ | k     | eGI (Bread = 100) |
|--------------------|--------------|-------|-------------------|
| 10                 | 82.46        | 0.018 | 77.02             |
| 20                 | 82.98        | 0.021 | 83.54             |
| 30                 | 83.29        | 0.022 | 88.28             |

Note:  $C_{\infty}$  and k represent the maximum hydrolysis extent and the kinetic constant, respectively; eGI, Estimated Glycemic Index.
